# Supplementary material for: Digitally Supported Dietary Protein Counseling Changes Dietary Protein Intake, Sources, and Distribution in Community-Dwelling Older Adults
Source: PubMed Central journal article supplement (PMC7913661; doi:10.3390/nu13020502), 2021-02-03
Supplement: nutrients-13-00502-s001.pdf [file nutrients-13-00502-s001.pdf]

## **Supplementary Document S1. Coaching schedule of the interventions**

Article title: Digitally supported dietary protein counselling changes dietary protein intake, sources and distribution in community-dwelling older adults

Journal name: Nutrients

Author names: Jantine van den Helder, Sjors Verlaan, Michael Tieland, Jorinde Scholten, Sumit Mehra, Bart Visser, Ben J.A. Kröse, Raoul H.H. Engelbert and Peter J.M. Weijs.

Corresponding Author: Jantine van den Helder, Faculty of Sports and Nutrition, Center of Expertise Urban Vitality, Amsterdam University of Applied Sciences, Dokter Meurerlaan 8, 1067 SM, Amsterdam, the Netherlands  
T +31621155919 | Email [j.e.m.van.den.helder@hva.nl](mailto:j.e.m.van.den.helder@hva.nl)

## Coaching schedule for 6-month intervention period

| Week | Activity                                           | Exercise coach                 | Diet coach                                                        |
|------|----------------------------------------------------|--------------------------------|-------------------------------------------------------------------|
| 0    | Baseline visit (0 months)                          | Phone call for appointment     | Group education session (60min)<br>Introduction and home material |
| 1    | Introduction + tablet PC and home package          | F2F - Home visit (90min)       | Phone call or VC (15min)                                          |
| 2    | Goal-setting (exercise)<br>Group evaluation (diet) | F2F - Home visit (90min)       | F2F - Community center (60min)                                    |
| 3    | Coach session                                      | VC (15min)                     | VC (15min)                                                        |
| 4    | Coach session                                      | VC (15min)                     | VC (15min)                                                        |
| 5    | Monthly group consultation                         | F2F - Community center (60min) | F2F - Community center (together)                                 |
| 6    | Coach session                                      | F2F - Home visit (60min)       | VC (15min)                                                        |
| 7    | Coach session                                      | VC (15min)                     | -                                                                 |
| 8    | Coach session                                      | VC (15min)                     | VC (15min)                                                        |
| 9    | Monthly group consultation                         | F2F - Community center (60min) | If desired - F2F with exercise coach                              |
| 10   | Adjusting goals<br>Coach session                   | F2F - Home visit (60min)       | VC (15min)                                                        |
| 11   | -                                                  | -                              | -                                                                 |
| 12   | Coach session                                      | VC (15min)                     | VC (15min)                                                        |
| 13   | Monthly group consultation                         | F2F - Community center (60min) | -                                                                 |
| 14   | Coach session                                      | F2F - Home visit (45min)       | VC (15min)                                                        |
| 15   | -                                                  | -                              | -                                                                 |
| 16   | Coach session                                      | VC (15min)                     | VC (15min)                                                        |
| 17   | Monthly group consultation                         | F2F - Community center (60min) | If desired - F2F with exercise coach                              |
| 18   | Coach session                                      | VC (15min)                     | -                                                                 |
| 19   | -                                                  | -                              | -                                                                 |
| 20   | Coach session                                      | -                              | VC (15min)                                                        |
| 21   | Monthly group consultation                         | F2F - Community center (60min) | If desired - F2F with exercise coach                              |
| 22   | Coach session<br>(operating independently)         | F2F - Home visit (45min)       | -                                                                 |
| 23   | -                                                  | -                              | -                                                                 |
| 24   | Coach session                                      | -                              | VC (15min)                                                        |
| 25   | Monthly group consultation<br>Closing session(s)   | F2F - Community center (60min) | F2F - Community center                                            |
| 26   | Effect visit (6 months)                            |                                |                                                                   |

This overview presents the contacts for the exercise and diet coaches, including the prescribed time. Detailed description of the coaching intervention was available in the coach manual. F2F, face-to-face contact; VC, Video call with Skype.

**Supplementary Document S2. Dietary counselling, design, materials and BCTs**

Article title: Digitally supported dietary protein counselling changes dietary protein intake, sources and distribution in community-dwelling older adults

Journal name: Nutrients

Author names: Jantine van den Helder, Sjors Verlaan, Michael Tieland, Jorinde Scholten, Sumit Mehra, Bart Visser, Ben J.A. Kröse, Raoul H.H. Engelbert and Peter J.M. Weijs.

Corresponding Author: Jantine van den Helder, Faculty of Sports and Nutrition, Center of Expertise Urban Vitality, Amsterdam University of Applied Sciences, Dokter Meurerlaan 8, 1067 SM, Amsterdam, the Netherlands  
T +31621155919 | Email [j.e.m.van.den.helder@hva.nl](mailto:j.e.m.van.den.helder@hva.nl)

## **Dietary counselling, design, materials and BCTs**

The dietary protein counselling intervention is developed with a similar approach as the blended home-based exercise program [17]. The process of the development of the design, feasibility phase until this Evaluation study is described following the Medical Research Council (MRC) framework for complex interventions. The combination of scientific literature, as well as practice-based evidence was encountered.

### **Development**

> Identifying the evidence base / modeling process and outcomes

### **Feasibility and Piloting**

> Testing procedures

### **Evaluation**

> RCT: Assessing effectiveness

## **Development**

### **Design considerations**

|                                                                                                            |                                                                                                                     |
|------------------------------------------------------------------------------------------------------------|---------------------------------------------------------------------------------------------------------------------|
| Blended HB-exercise intervention<br>1) Functional exercises<br>2) Behavior change<br>3) Blended technology | Dietary protein counselling intervention<br>1) Protein requirements<br>2) Behavior change<br>3) Blended counselling |
|------------------------------------------------------------------------------------------------------------|---------------------------------------------------------------------------------------------------------------------|

## **Dietary protein counselling intervention**

### *1) Protein requirements*

As described in this paper, the previous published protocol paper[16] and effect paper[19]:

- Goal: a minimum of 1.2 g per kg body weight per day (g/kg BW/day), and the optimal amount of 1.5 g/kg BW/day

Subsequently:

- Timing: breakfast, lunch, dinner, snacks, exercise (eating occasions)
- Source of protein: high quality protein sources, such as dairy protein
- Amount per meal: 25 g protein per meal
- Personalization: personal factors (e.g. allergies, vegetarian pattern)
- Healthy eating pattern: Dutch Dietary guidelines 2015
- Adaptability: grocery shopping in supermarket of own choice & own expense

### *2) Behavior change*

In our previous paper of the design of the blended intervention [17], the behavior change technique (BCT) taxonomy is introduced [43].

Techniques that are associated with the self-regulation of behavior appear particularly effective: goal-setting and self-monitoring [37]. In addition, other techniques that increase self-efficacy were added to encounter for effective strategies in the blended counselling. The self-determination theory (SDT) is a theoretical framework of human motivation and behavior developed by Deci and Ryan<sup>1</sup>. The SDT states that an autonomous style of self-regulation (identified, integrated and intrinsic) leads to more positive behavioral outcomes. For individual dietary counselling Motivational Interviewing (MI) is chosen as intervention technique, as it shares the same values as SDT [39].

Within behavioral nutrition and exercise interventions that target of lifestyle changes, the combination of group contacts with individual contacts is seen more often as successful [44,45]. The opportunity arises to incorporate several group-related BCTs and individual-related BCTs into the intervention components and materials.

### *3) Blended counselling*

Our blended counselling can be introduced as the combination of face-to-face contacts and tele-health contacts (primarily videoconferencing with an application, as mentioned as digitally supported). Digitally supported dietary counselling has benefits of remote guidance including non-verbal communication, reduced travel time and costs. In current dietetics practice face-to-face contacts are most often used, which is beneficial for the clients' trust and to exchange documents. Especially in the population of older adults, the face-to-face contacts are common practice.

## Identifications of the requirements for the dietician coach

### Coaching tools

- 1) *Feedback and monitoring*
- 2) *Interprofessional communication*
- 3) *Reporting*

> A shared coaching manual was developed and a coach CMS website. The coaching manual included information on the Coaching schedule (See **Additional Document S1**), theoretical framework, goals per visit, and other features to be able to carry out the intervention. We were aiming to improve knowledge, competence and skills, in order to increase the level of expertise of the (student) coaching professional. Topics as e-coaching, motivational interviewing and interprofessional collaboration were included. The coach CMS website was designed for interprofessional communication and reporting purposes.

### Dietary counselling materials and BCTs

Additional to the scientific evidence, the requirements and functional components were collected by use of expert interviews. The following intervention materials were developed or encountered.

| Functional component of the Dietary protein counselling intervention | BCTs                                                                                                                                                                                                                                                                    |
|----------------------------------------------------------------------|-------------------------------------------------------------------------------------------------------------------------------------------------------------------------------------------------------------------------------------------------------------------------|
| Videoconferencing app (Skype)                                        | behavioral rehearsal, graded tasks, verbal persuasion about capability.                                                                                                                                                                                                 |
| Classroom lecture at baseline assessment; elaboration session        | information about health consequences, framing/reframing, behavioral practice/rehearsal (workbook/reading food labels), guided practice (direct experience/tasting), goal setting (1.2–1.5 g/kg/day), social comparison.                                                |
| Information magazine with emphasis on protein                        | rehearsal of information (knowledge/competence), behavioral rehearsal.                                                                                                                                                                                                  |
| Two-week workbook; including recipes, protein product group list     | self-monitoring of behavior & goals, habit formation, behavior rehearsal, action planning.                                                                                                                                                                              |
| Group session after two weeks                                        | guided practice (videoconferencing/increase e-health literacy), feedback on behavior (coach/workbook), goal setting, graded tasks, problem solving, planning coping responses, social support (practical/emotional), social reward, verbal persuasion about capability. |
| Monthly group visit                                                  | e.g. action planning, problem solving, planning coping responses, social support.                                                                                                                                                                                       |

|                                               |                                                                                                                                                             |
|-----------------------------------------------|-------------------------------------------------------------------------------------------------------------------------------------------------------------|
| Individual video-conferencing and counselling | social support, social incentive/reward, action planning, feedback on behavior, goal evaluation, prompts/cues, problem solving (motivational interviewing). |
|-----------------------------------------------|-------------------------------------------------------------------------------------------------------------------------------------------------------------|

### **Feasibility and Piloting**

A pilot was performed with the dietary counselling intervention and materials with three existing exercise groups of community-dwelling older adults. These were selected from another region in the Netherlands, as the target population of the RCT was the Amsterdam metropolitan region.

> After the pilots the information brochure and coaching manual was further developed and improved.

### **Evaluation**

> RCT: Assessing effectiveness. The results of this dietary protein counselling intervention is furthermore published in this article.

### **Reference:**

<sup>1</sup>Deci EL, Ryan RM: The "What" and "Why" of Goal Pursuits: Human Needs and the Self Determination of Behavior. Psychological Inquiry 2000, 11: 227-268.

## **Supplementary Figure S1. CONSORT flow chart**

Article title: Digitally supported dietary protein counselling changes dietary protein intake, sources and distribution in community-dwelling older adults

Journal name: Nutrients

Author names: Jantine van den Helder, Sjors Verlaan, Michael Tieland, Jorinde Scholten, Sumit Mehra, Bart Visser, Ben J.A. Kröse, Raoul H.H. Engelbert and Peter J.M. Weijs.

Corresponding Author: Jantine van den Helder, Faculty of Sports and Nutrition, Center of Expertise Urban Vitality, Amsterdam University of Applied Sciences, Dokter Meurerlaan 8, 1067 SM, Amsterdam, the Netherlands

T +31621155919 | Email [j.e.m.van.den.helder@hva.nl](mailto:j.e.m.van.den.helder@hva.nl)



**Figure S1.** CONSORT flow diagram of VITAMIN study clusters and participants. IQR = interquartile

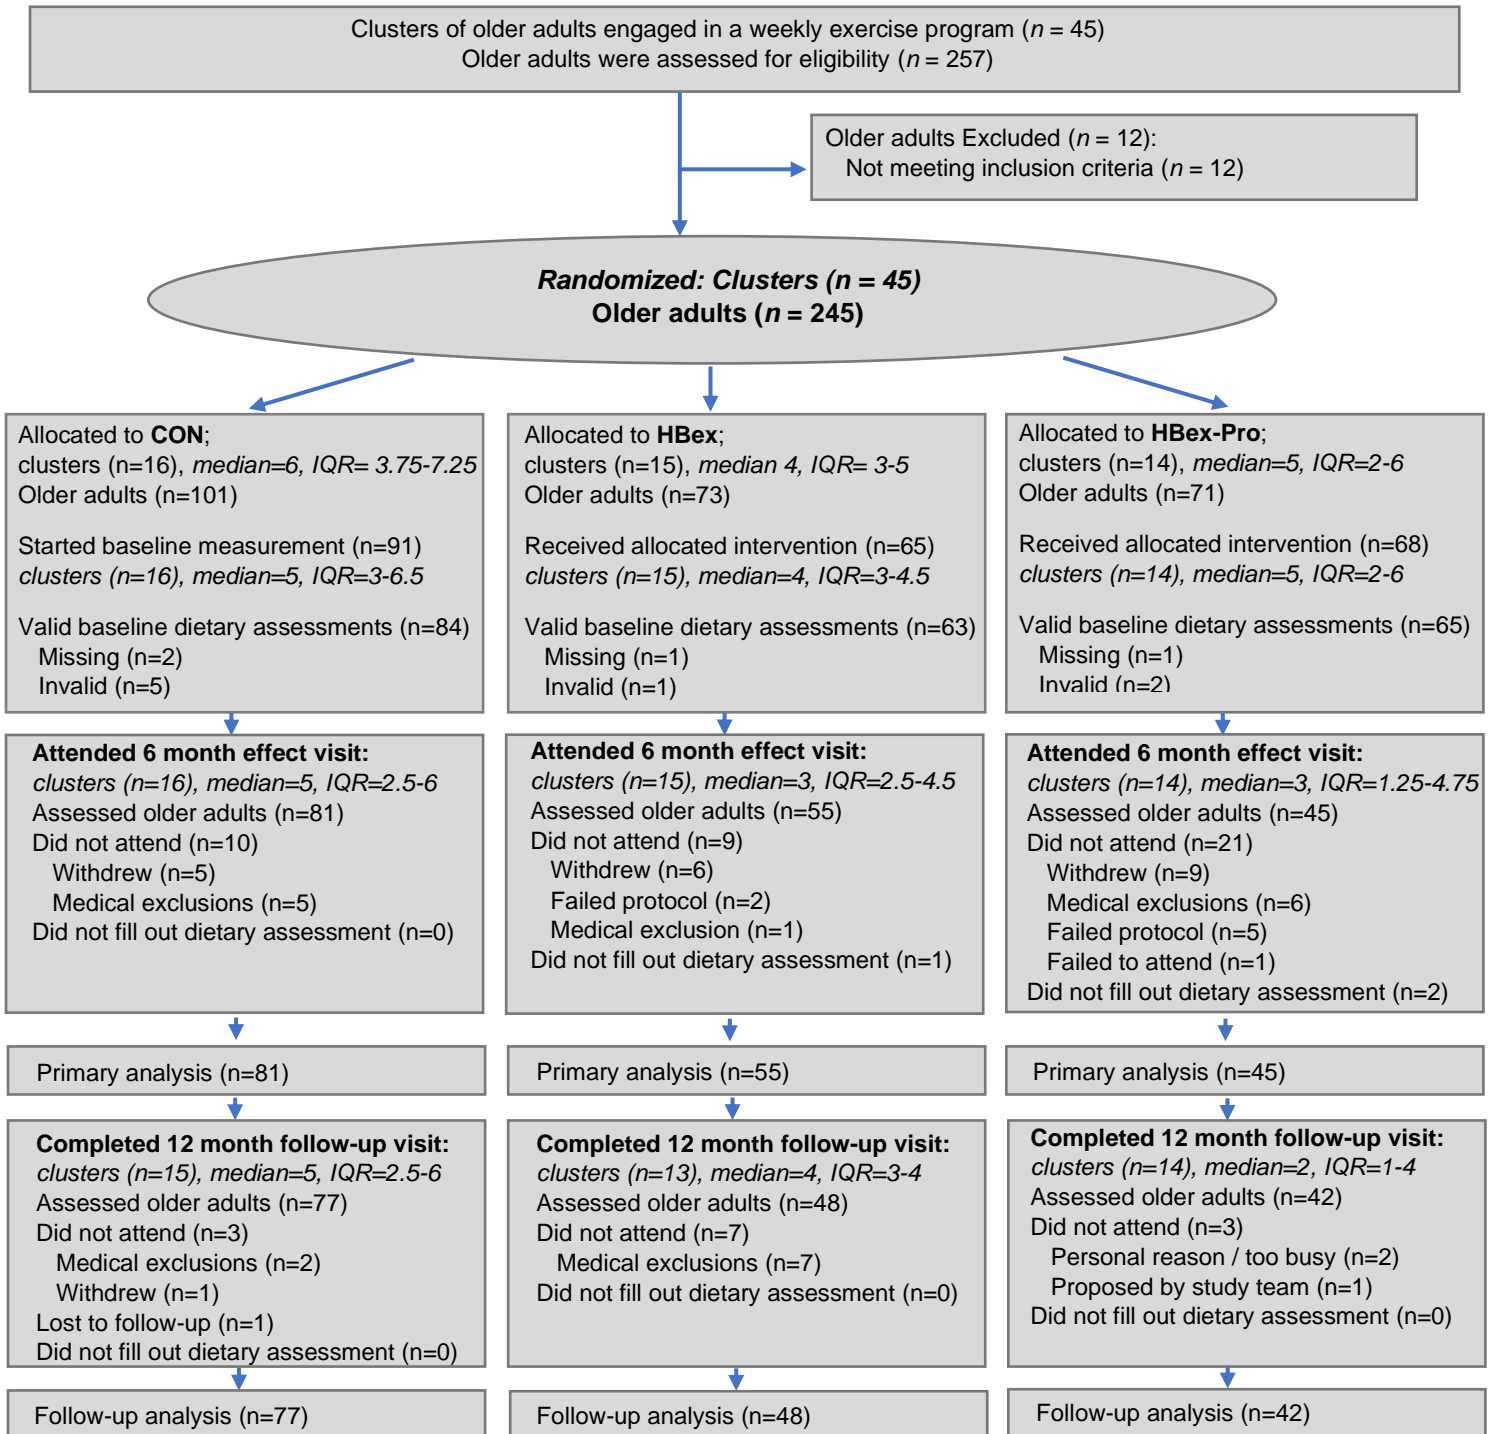

**Supplementary TableS1. Effects of protein counselling on protein intake in older adults**

Article title: Digitally supported dietary protein counselling changes dietary protein intake, sources and distribution in community-dwelling older adults

Journal name: Nutrients

Author names: Jantine van den Helder, Sjors Verlaan, Michael Tieland, Jorinde Scholten, Sumit Mehra, Bart Visser, Ben J.A. Kröse, Raoul H.H. Engelbert and Peter J.M. Weijs.

Corresponding Author: Jantine van den Helder, Faculty of Sports and Nutrition, Center of Expertise Urban Vitality, Amsterdam University of Applied Sciences, Dokter Meurerlaan 8, 1067 SM, Amsterdam, the Netherlands  
T +31621155919 | Email [j.e.m.van.den.helder@hva.nl](mailto:j.e.m.van.den.helder@hva.nl)

| Table S1. Effects of protein counselling on protein intake in older adults. Values are estimated marginal means (SE) unless stated otherwise |      |                   |             |             |                               |                         |                       |                   |                       |                  |
|----------------------------------------------------------------------------------------------------------------------------------------------|------|-------------------|-------------|-------------|-------------------------------|-------------------------|-----------------------|-------------------|-----------------------|------------------|
| Outcome variable                                                                                                                             |      | Randomized groups |             |             | MM time effects               | MM interaction effects* |                       |                   |                       |                  |
|                                                                                                                                              |      | HBex-PRO #        | HBex        | CON         |                               | HBex-PRO vs HBex †      |                       | HBex-PRO vs CON ‡ |                       |                  |
|                                                                                                                                              |      | EMM (SE)          | EMM (SE)    | EMM (SE)    | Difference (SE) p-value       |                         | Difference (SE 95%CI) | P value           | Difference (95%CI)    | P value          |
| <i>Energy &amp; Macro nutrients</i>                                                                                                          |      |                   |             |             |                               |                         |                       |                   |                       |                  |
| Energy <sup>a</sup>                                                                                                                          | 0 m  | 1900 (42)         | 1851 (37)   | 1887 (33)   |                               |                         |                       |                   |                       |                  |
| (Kcal/day)                                                                                                                                   | 6 m  | 2119 (42)         | 1862 (37)   | 1930 (33)   | <b>+220 (60) p&lt;0.001</b>   | Intervention effect     | -208.0 (-359.7;-56.2) | <b>0.007</b>      | -176.8 (-319.8;-33.8) | <b>0.015</b>     |
|                                                                                                                                              | 12 m | 2009 (42)         | 1863 (37)   | 1860 (33)   | +110 (62) p=0.075             | Follow-up effect        | -97.2 (-255.8;61.4)   | 0.230             | -136.8 (-283.7;10.1)  | 0.068            |
| Energy                                                                                                                                       | 0 m  | 26.1 (0.7)        | 26.2 (0.9)  | 26.3 (0.5)  |                               |                         |                       |                   |                       |                  |
| (Kcal/kg/day)                                                                                                                                | 6 m  | 28.1 (0.7)        | 26.9 (0.9)  | 27.1 (0.5)  | <b>+1.98 (0.9) p=0.028</b>    | Intervention effect     | -1.20 (-3.51;1.10)    | 0.306             | -1.18 (-3.35;0.98)    | 0.284            |
|                                                                                                                                              | 12 m | 26.6 (0.7)        | 26.9 (0.9)  | 26.0 (0.5)  | +0.51 (0.9) p=0.579           | Follow-up effect        | +0.19 (-2.21;2.60)    | 0.875             | -0.83 (-3.05;1.39)    | 0.464            |
| Carbohydrates                                                                                                                                | 0 m  | 187.0 (5.4)       | 185.1 (4.3) | 186.0 (4.0) |                               |                         |                       |                   |                       |                  |
| (g/day)                                                                                                                                      | 6 m  | 192.8 (5.4)       | 187.4 (4.3) | 189.9 (4.0) | +5.79 (6.6) p=0.382           | Intervention effect     | -3.57 (-20.5;13.4)    | 0.680             | -1.88 (-17.8;14.0)    | 0.817            |
|                                                                                                                                              | 12 m | 191.5 (5.4)       | 189.1 (4.3) | 185.8 (4.0) | +4.54 (6.8) p=0.506           | Follow-up effect        | -0.57 (-18.3;17.1)    | 0.949             | -4.71 (-21.1;11.6)    | 0.572            |
| Fat                                                                                                                                          | 0 m  | 75.8 (1.9)        | 73.7 (1.6)  | 76.4 (1.4)  |                               |                         |                       |                   |                       |                  |
| (g/day)                                                                                                                                      | 6 m  | 87.3 (1.9)        | 73.6 (1.6)  | 79.4 (1.4)  | <b>+11.6 (3.5) p=0.001</b>    | Intervention effect     | -11.68 (-20.5;-2.82)  | <b>0.010</b>      | -8.62 (-16.9;-.29)    | <b>0.043</b>     |
|                                                                                                                                              | 12 m | 80.8 (1.9)        | 75.1 (1.6)  | 75.7 (1.4)  | +4.99 (3.6) p=0.168           | Follow-up effect        | -3.58 (-12.8;5.7)     | 0.450             | -5.69 (-14.2;2.87)    | 0.193            |
| Protein                                                                                                                                      | 0 m  | 78.6 (1.8)        | 76.1 (1.6)  | 78.3 (1.3)  |                               |                         |                       |                   |                       |                  |
| (g/day)                                                                                                                                      | 6 m  | 107.4 (1.8)       | 78.1 (1.6)  | 81.1 (1.3)  | <b>+28.9 (2.8) p&lt;0.001</b> | Intervention effect     | -26.9 (-34.0;-19.7)   | <b>&lt;0.001</b>  | -26.2 (-32.9;-19.5)   | <b>&lt;0.001</b> |
|                                                                                                                                              | 12 m | 94.5 (1.8)        | 75.2 (1.6)  | 74.4 (1.3)  | <b>+15.9 (2.9) p&lt;0.001</b> | Follow-up effect        | -16.9 (-24.4;-9.4)    | <b>&lt;0.001</b>  | -19.9 (-26.8;-12.9)   | <b>&lt;0.001</b> |
| Protein                                                                                                                                      | 0 m  | 1.08 (0.0)        | 1.07 (0.0)  | 1.08 (0.0)  |                               |                         |                       |                   |                       |                  |
| (g/kg/day)                                                                                                                                   | 6 m  | 1.43 (0.0)        | 1.11 (0.0)  | 1.13 (0.0)  | <b>+0.35 (0.0) p&lt;0.001</b> | Intervention effect     | -0.31 (-.41;-.20)     | <b>&lt;0.001</b>  | -0.31 (-.40;-.21)     | <b>&lt;0.001</b> |
|                                                                                                                                              | 12 m | 1.25 (0.0)        | 1.08 (0.0)  | 1.04 (0.0)  | <b>+0.18 (0.0) p&lt;0.001</b> | Follow-up effect        | -0.17 (-.28;-.06)     | <b>0.002</b>      | -0.23 (-.33;-.13)     | <b>&lt;0.001</b> |
| <i>Protein source</i>                                                                                                                        |      |                   |             |             |                               |                         |                       |                   |                       |                  |
| Protein animal                                                                                                                               | 0 m  | 49.7 (1.4)        | 48.2 (1.1)  | 49.8 (1.0)  |                               |                         |                       |                   |                       |                  |
| (g/day)                                                                                                                                      | 6 m  | 76.2 (1.4)        | 49.6 (1.1)  | 52.4 (1.0)  | <b>+26.6 (2.6) p&lt;0.001</b> | Intervention effect     | -25.21 (-31.7;-18.7)  | <b>&lt;0.001</b>  | -23.92 (-30.0;-17.8)  | <b>&lt;0.001</b> |
|                                                                                                                                              | 12 m | 64.4 (1.4)        | 46.2 (1.1)  | 45.6 (1.0)  | <b>+14.7 (2.6) p&lt;0.001</b> | Follow-up effect        | -16.76 (-23.5;-10.0)  | <b>&lt;0.001</b>  | -18.97 (-25.2;-12.8)  | <b>&lt;0.001</b> |
| Protein plant                                                                                                                                | 0 m  | 28.8 (0.9)        | 28.0 (0.7)  | 28.2 (0.7)  |                               |                         |                       |                   |                       |                  |
| (g/day)                                                                                                                                      | 6 m  | 30.7 (0.9)        | 28.6 (0.7)  | 28.3 (0.7)  | +1.89 (1.1) p=0.091           | Intervention effect     | -1.32 (-4.17;1.54)    | 0.366             | -1.66 (-4.34;1.02)    | 0.224            |
|                                                                                                                                              | 12 m | 28.1 (0.9)        | 28.9 (0.7)  | 28.7 (0.7)  | -0.36 (1.1) p=0.752           | Follow-up effect        | +1.25 (-1.73;4.23)    | 0.411             | +0.85 (-1.90;3.60)    | 0.545            |
| <i>Product groups</i>                                                                                                                        |      |                   |             |             |                               |                         |                       |                   |                       |                  |
| Egg                                                                                                                                          | 0 m  | 2.5 (0.1)         | 2.5 (0.1)   | 2.4 (0.1)   |                               |                         |                       |                   |                       |                  |
| (g/day)                                                                                                                                      | 6 m  | 3.1 (0.1)         | 2.3 (0.1)   | 2.0 (0.1)   | +0.60 (0.4) p=0.157           | Intervention effect     | -0.83 (-1.89;.23)     | 0.126             | -1.01 (-2.01;.00)     | <b>0.049</b>     |
|                                                                                                                                              | 12 m | 4.4 (0.1)         | 2.5 (0.1)   | 1.8 (0.1)   | <b>+1.85 (0.4) p&lt;0.001</b> | Follow-up effect        | -1.84 (-2.95;-.73)    | <b>0.001</b>      | -2.52 (-3.55;-1.49)   | <b>&lt;0.001</b> |
| Fish                                                                                                                                         | 0 m  | 6.0 (0.5)         | 5.8 (0.3)   | 6.9 (0.4)   |                               |                         |                       |                   |                       |                  |
| (g/day)                                                                                                                                      | 6 m  | 9.9 (0.5)         | 4.4 (0.3)   | 6.6 (0.4)   | <b>+3.99 (1.3) p=0.003</b>    | Intervention effect     | -5.32 (-8.63;-2.00)   | <b>0.002</b>      | -4.35 (-7.47;-1.23)   | <b>0.006</b>     |
|                                                                                                                                              | 12 m | 9.4 (0.5)         | 3.6 (0.3)   | 5.6 (0.4)   | <b>+3.44 (1.4) p=0.012</b>    | Follow-up effect        | -5.60 (-9.07;-2.13)   | <b>0.002</b>      | -4.72 (-7.93;-1.51)   | <b>0.004</b>     |
| Meat                                                                                                                                         | 0 m  | 17.7 (0.7)        | 17.7 (0.8)  | 16.8 (0.6)  |                               |                         |                       |                   |                       |                  |
| (g/day)                                                                                                                                      | 6 m  | 25.5 (0.7)        | 22.2 (0.8)  | 20.1 (0.6)  | <b>+7.81 (2.1) p&lt;0.001</b> | Intervention effect     | -3.27 (-8.45;1.90)    | 0.215             | -4.46 (-9.35;4.2)     | 0.073            |
|                                                                                                                                              | 12 m | 17.6 (0.7)        | 18.4 (0.8)  | 14.8 (0.6)  | -0.09 (2.1) p=0.967           | Follow-up effect        | +0.75 (-4.66;6.17)    | 0.785             | -1.88 (-6.90;3.13)    | 0.462            |
| Dairy                                                                                                                                        | 0 m  | 19.7 (1.1)        | 19.2 (0.7)  | 20.7 (0.7)  |                               |                         |                       |                   |                       |                  |
| (g/day)                                                                                                                                      | 6 m  | 33.9 (1.1)        | 18.1 (0.7)  | 20.9 (0.7)  | <b>+14.2 (1.4) p&lt;0.001</b> | Intervention effect     | -15.33 (-19.0;-11.7)  | <b>&lt;0.001</b>  | -13.95 (-17.4;-10.5)  | <b>&lt;0.001</b> |
|                                                                                                                                              | 12 m | 29.3 (1.1)        | 19.2 (0.7)  | 20.1 (0.7)  | <b>+9.65 (1.5) p&lt;0.001</b> | Follow-up effect        | -9.71 (-13.5;-5.90)   | <b>&lt;0.001</b>  | -10.24 (-13.8;-6.72)  | <b>&lt;0.001</b> |
| Bread                                                                                                                                        | 0 m  | 10.9 (0.5)        | 10.3 (0.4)  | 10.3 (0.4)  |                               |                         |                       |                   |                       |                  |
| (g/day)                                                                                                                                      | 6 m  | 10.6 (0.5)        | 10.4 (0.4)  | 10.6 (0.4)  | -0.35 (0.6) p=0.566           | Intervention effect     | +0.45 (-1.1;2.00)     | 0.566             | +0.64 (-.82;2.10)     | 0.390            |
|                                                                                                                                              | 12 m | 10.6 (0.5)        | 10.9 (0.4)  | 10.5 (0.4)  | -0.33 (0.6) p=0.598           | Follow-up effect        | +0.93 (-.69;2.54)     | 0.261             | +0.46 (-1.04;1.95)    | 0.549            |

|                                    |      |            |            |            |                                       |                     |                       |                  |                       |                  |
|------------------------------------|------|------------|------------|------------|---------------------------------------|---------------------|-----------------------|------------------|-----------------------|------------------|
| Vegetables/fruits                  | 0 m  | 4.5 (0.2)  | 4.4 (0.2)  | 4.4 (0.2)  |                                       |                     |                       |                  |                       |                  |
| (g/day)                            | 6 m  | 4.6 (0.2)  | 4.5 (0.2)  | 4.2 (0.2)  | +0.09 (0.4) <i>p</i> =0.780           | Intervention effect | +0.06 (-.78;.89)      | 0.891            | -0.25 (-1.03;.54)     | 0.539            |
|                                    | 12 m | 4.2 (0.2)  | 4.1 (0.2)  | 4.4 (0.2)  | -0.38 (0.4) <i>p</i> =0.268           | Follow-up effect    | +0.12 (-.75;1.00)     | 0.768            | +0.43 (-.38;1.23)     | 0.322            |
| Legumes/Soy                        | 0 m  | 1.1 (0.2)  | 1.3 (0.2)  | 1.3 (0.2)  |                                       |                     |                       |                  |                       |                  |
| (g/day)                            | 6 m  | 1.8 (0.2)  | 1.5 (0.2)  | 1.5 (0.2)  | +0.73 (0.5) <i>p</i> =0.125           | Intervention effect | -0.54 (-1.75;.67)     | 0.381            | -0.50 (-1.63;.64)     | 0.394            |
|                                    | 12 m | 1.4 (0.2)  | 1.1 (0.2)  | 1.7 (0.2)  | +0.39 (0.5) <i>p</i> =0.429           | Follow-up effect    | -0.51 (-1.78;.75)     | 0.428            | +0.02 (-1.15;1.19)    | 0.971            |
| Nuts/seeds                         | 0 m  | 4.0 (0.2)  | 3.7 (0.1)  | 3.9 (0.2)  |                                       |                     |                       |                  |                       |                  |
| (g/day)                            | 6 m  | 5.8 (0.2)  | 3.2 (0.1)  | 3.2 (0.2)  | <b>+1.85 (0.7) <i>p</i>=0.011</b>     | Intervention effect | -2.40 (-4.19;-.61)    | <b>0.009</b>     | -2.61 (-4.29;-.92)    | <b>0.002</b>     |
|                                    | 12 m | 4.7 (0.2)  | 3.9 (0.1)  | 3.6 (0.2)  | +0.71 (0.7) <i>p</i> =0.344           | Follow-up effect    | -0.59 (-2.47;1.29)    | 0.539            | -1.04 (-2.77;.69)     | 0.239            |
| Other                              | 0 m  | 12.0 (0.6) | 11.6 (0.3) | 11.6 (0.4) |                                       |                     |                       |                  |                       |                  |
| (g/day)                            | 6 m  | 12.4 (0.6) | 11.7 (0.3) | 12.1 (0.4) | +0.48 (1.0) <i>p</i> =0.619           | Intervention effect | -0.34 (-2.82;2.13)    | 0.786            | +0.05 (-2.28;2.39)    | 0.964            |
|                                    | 12 m | 13.1 (0.6) | 11.8 (0.3) | 12.1 (0.4) | +1.18 (1.0) <i>p</i> =0.240           | Follow-up effect    | -0.96 (-3.55;1.63)    | 0.466            | -0.63 (-3.03;1.77)    | 0.609            |
| <b>Dairy detailed</b>              |      |            |            |            |                                       |                     |                       |                  |                       |                  |
| Cheese                             | 0 m  | 7.9 (0.3)  | 7.8 (0.3)  | 8.1 (0.3)  |                                       |                     |                       |                  |                       |                  |
| (g/day)                            | 6 m  | 9.9 (0.3)  | 6.3 (0.3)  | 8.4 (0.3)  | <b>+1.97 (0.9) <i>p</i>=0.034</b>     | Intervention effect | -3.42 (-5.73;-1.12)   | <b>0.004</b>     | -1.65 (-3.82;.51)     | 0.134            |
|                                    | 12 m | 9.2 (0.3)  | 7.6 (0.3)  | 7.3 (0.3)  | +1.30 (1.0) <i>p</i> =0.174           | Follow-up effect    | -1.46 (-3.87;.96)     | 0.237            | -2.06 (-4.28;.17)     | 0.070            |
| Milk                               | 0 m  | 5.2 (0.6)  | 5.3 (0.5)  | 6.0 (0.5)  |                                       |                     |                       |                  |                       |                  |
| (g/day)                            | 6 m  | 8.4 (0.6)  | 4.8 (0.5)  | 6.2 (0.5)  | <b>+3.22 (0.7) <i>p</i>&lt;0.001</b>  | Intervention effect | -3.72 (5.47;-1.96)    | <b>&lt;0.001</b> | -3.05 (-4.69;-1.40)   | <b>&lt;0.001</b> |
|                                    | 12 m | 7.3 (0.6)  | 5.3 (0.5)  | 5.9 (0.5)  | <b>+2.14 (0.7) <i>p</i>=0.002</b>     | Follow-up effect    | -2.09 (-3.92;-.26)    | <b>0.026</b>     | -2.25 (-3.94;-.55)    | <b>0.009</b>     |
| Quark                              | 0 m  | 2.5 (0.5)  | 1.7 (0.3)  | 2.1 (0.3)  |                                       |                     |                       |                  |                       |                  |
| (g/day)                            | 6 m  | 10.9 (0.5) | 2.0 (0.3)  | 2.3 (0.3)  | <b>+8.42 (0.8) <i>p</i>&lt;0.001</b>  | Intervention effect | -8.17 (-10.22;-6.11)  | <b>&lt;0.001</b> | -8.17 (-10.10;-6.23)  | <b>&lt;0.001</b> |
|                                    | 12 m | 8.1 (0.5)  | 1.6 (0.3)  | 2.3 (0.3)  | <b>+5.55 (0.8) <i>p</i>&lt;0.001</b>  | Follow-up effect    | -5.67 (-7.82;-3.51)   | <b>&lt;0.001</b> | -5.31 (-7.30;-3.32)   | <b>&lt;0.001</b> |
| Yoghurt                            | 0 m  | 3.0 (0.3)  | 4.0 (0.4)  | 3.6 (0.2)  |                                       |                     |                       |                  |                       |                  |
| (g/day)                            | 6 m  | 3.3 (0.3)  | 4.2 (0.4)  | 2.9 (0.2)  | +0.31 (0.5) <i>p</i> =0.544           | Intervention effect | -0.16 (-1.46;1.13)    | 0.806            | -0.98 (-2.20;.24)     | 0.115            |
|                                    | 12 m | 3.7 (0.3)  | 4.3 (0.4)  | 3.3 (0.2)  | +0.70 (0.5) <i>p</i> =0.179           | Follow-up effect    | -0.46 (-1.81;.89)     | 0.504            | -0.99 (-2.24;.26)     | 0.120            |
| Dairy other                        | 0 m  | 0.8 (0.2)  | 0.7 (0.1)  | 0.9 (0.1)  |                                       |                     |                       |                  |                       |                  |
| (g/day)                            | 6 m  | 1.2 (0.2)  | 0.8 (0.1)  | 0.9 (0.1)  | +0.43 (0.3) <i>p</i> =0.086           | Intervention effect | -0.33 (-.96;.31)      | 0.309            | -0.43 (-1.02;.17)     | 0.162            |
|                                    | 12 m | 0.9 (0.2)  | 0.4 (0.1)  | 1.0 (0.1)  | +0.13 (0.3) <i>p</i> =0.613           | Follow-up effect    | -0.47 (-1.13;.20)     | 0.168            | +0.01 (-.60;.63)      | 0.968            |
| <b>Amino acids</b>                 |      |            |            |            |                                       |                     |                       |                  |                       |                  |
| Essential AA                       | 0 m  | 31.1 (0.7) | 30.0 (0.6) | 31.1 (0.6) |                                       |                     |                       |                  |                       |                  |
| (g/day)                            | 6 m  | 43.1 (0.7) | 30.6 (0.6) | 31.9 (0.6) | <b>+11.97 (1.2) <i>p</i>&lt;0.001</b> | Intervention effect | -11.38 (-14.47;-8.30) | <b>&lt;0.001</b> | -11.18 (-14.07;-8.28) | <b>&lt;0.001</b> |
|                                    | 12 m | 37.0 (0.7) | 30.3 (0.6) | 29.8 (0.6) | <b>+5.81 (1.2) <i>p</i>&lt;0.001</b>  | Follow-up effect    | -5.53 (-8.76;-2.31)   | <b>0.001</b>     | -7.05 (-10.03;-4.08)  | <b>&lt;0.001</b> |
| Non-essential AA <sup>b</sup>      | 0 m  | 35.0 (0.8) | 33.6 (0.7) | 34.7 (0.6) |                                       |                     |                       |                  |                       |                  |
| (g/day)                            | 6 m  | 46.8 (0.8) | 34.0 (0.7) | 35.8 (0.6) | <b>+11.84 (1.3) <i>p</i>&lt;0.001</b> | Intervention effect | -11.46 (-14.78;-8.14) | <b>&lt;0.001</b> | -10.80 (-13.92;-7.68) | <b>&lt;0.001</b> |
|                                    | 12 m | 40.1 (0.8) | 34.6 (0.7) | 33.6 (0.6) | <b>+5.10 (1.4) <i>p</i>&lt;0.001</b>  | Follow-up effect    | -4.06 (-7.53;.58)     | <b>0.022</b>     | -6.17 (-9.38;-2.97)   | <b>0.001</b>     |
| BCAA                               | 0 m  | 14.2 (0.3) | 13.7 (0.3) | 14.3 (0.3) |                                       |                     |                       |                  |                       |                  |
| (g/day)                            | 6 m  | 19.7 (0.3) | 13.9 (0.3) | 14.6 (0.3) | <b>+5.44 (0.5) <i>p</i>&lt;0.001</b>  | Intervention effect | -5.25 (-6.64;-3.86)   | <b>&lt;0.001</b> | -5.15 (-6.46;-3.84)   | <b>&lt;0.001</b> |
|                                    | 12 m | 17.0 (0.3) | 14.0 (0.3) | 13.7 (0.3) | <b>+2.72 (0.6) <i>p</i>&lt;0.001</b>  | Follow-up effect    | -2.45 (-3.91;-0.99)   | <b>0.001</b>     | -3.24 (-4.58;-1.90)   | <b>&lt;0.001</b> |
| Leucine                            | 0 m  | 6.3 (0.1)  | 6.0 (0.1)  | 6.3 (0.1)  |                                       |                     |                       |                  |                       |                  |
| (g/day)                            | 6 m  | 8.7 (0.1)  | 6.1 (0.1)  | 6.4 (0.1)  | <b>+2.39 (0.2) <i>p</i>&lt;0.001</b>  | Intervention effect | -2.30 (-2.92;-1.67)   | <b>&lt;0.001</b> | -2.27 (-2.84;-1.68)   | <b>&lt;0.001</b> |
|                                    | 12 m | 7.4 (0.1)  | 6.2 (0.1)  | 6.1 (0.1)  | <b>+1.17 (0.2) <i>p</i>&lt;0.001</b>  | Follow-up effect    | -1.03 (-1.68;-.39)    | <b>0.002</b>     | -1.40 (-1.99;-.80)    | <b>&lt;0.001</b> |
| <b>Protein at eating occasions</b> |      |            |            |            |                                       |                     |                       |                  |                       |                  |
| MM 1 - breakfast                   | 0 m  | 13.1 (0.6) | 13.2 (0.6) | 12.9 (0.5) |                                       |                     |                       |                  |                       |                  |
|                                    | 6 m  | 19.2 (0.6) | 13.3 (0.6) | 13.0 (0.5) | <b>+6.15 (1.0) <i>p</i>&lt;0.001</b>  | Intervention effect | -6.04 (-8.51;-3.58)   | <b>&lt;0.001</b> | -6.07 (-8.39;-3.75)   | <b>&lt;0.001</b> |
|                                    | 12 m | 19.8 (0.6) | 13.3 (0.6) | 12.5 (0.5) | <b>+6.73 (1.1) <i>p</i>&lt;0.001</b>  | Follow-up effect    | -6.66 (-9.24;-4.08)   | <b>&lt;0.001</b> | -7.16 (-9.54;-4.78)   | <b>&lt;0.001</b> |
| MM 2 - morning                     | 0 m  | 3.9 (0.3)  | 3.4 (0.2)  | 3.7 (0.2)  |                                       |                     |                       |                  |                       |                  |

|                  |      |            |            |            |                                       |                     |                      |                  |                      |                  |
|------------------|------|------------|------------|------------|---------------------------------------|---------------------|----------------------|------------------|----------------------|------------------|
|                  | 6 m  | 5.6 (0.3)  | 3.2 (0.2)  | 3.9 (0.2)  | <b>+1.77 (0.7) <i>p</i>=0.007</b>     | Intervention effect | -1.96 (-3.6;-.33)    | <b>0.019</b>     | -1.56 (-3.10;-.02)   | <b>0.047</b>     |
|                  | 12 m | 5.6 (0.3)  | 3.5 (0.2)  | 3.3 (0.2)  | <b>+1.69 (0.7) <i>p</i>=0.012</b>     | Follow-up effect    | -1.54 (-3.26;.17)    | 0.078            | -2.16 (-3.74;-.58)   | <b>0.007</b>     |
| MM 3 - lunch     | 0 m  | 18.3 (0.7) | 18.0 (0.5) | 18.8 (0.5) |                                       |                     |                      |                  |                      |                  |
|                  | 6 m  | 25.8 (0.7) | 17.4 (0.5) | 19.3 (0.5) | <b>+7.48 (1.2) <i>p</i>&lt;0.001</b>  | Intervention effect | -8.06 (-11.12;-5.00) | <b>&lt;0.001</b> | -6.97 (-9.85;-4.10)  | <b>&lt;0.001</b> |
|                  | 12 m | 22.5 (0.7) | 19.5 (0.5) | 18.6 (0.5) | <b>+4.21 (1.2) <i>p</i>=0.001</b>     | Follow-up effect    | -2.73 (-5.93;.47)    | 0.095            | -4.35 (-7.31;-1.40)  | <b>0.004</b>     |
| MM 4 - afternoon | 0 m  | 6.5 (0.3)  | 6.1 (0.3)  | 6.1 (0.2)  |                                       |                     |                      |                  |                      |                  |
|                  | 6 m  | 9.0 (0.3)  | 5.9 (0.3)  | 6.2 (0.2)  | <b>+2.54 (1.0) <i>p</i>=0.009</b>     | Intervention effect | -2.68 (-5.07;-.29)   | <b>0.028</b>     | -2.41 (-4.66;-.16)   | <b>0.036</b>     |
|                  | 12 m | 6.9 (0.3)  | 4.1 (0.3)  | 5.2 (0.2)  | +0.47 (1.0) <i>p</i> =0.639           | Follow-up effect    | -2.40 (-4.91;.11)    | 0.061            | -1.33 (-3.65;1.0)    | 0.260            |
| MM 5 - diner     | 0 m  | 34.1 (0.7) | 33.7 (0.7) | 34.6 (0.7) |                                       |                     |                      |                  |                      |                  |
|                  | 6 m  | 44.7 (0.7) | 36.6 (0.7) | 37.3 (0.7) | <b>+10.61 (1.9) <i>p</i>&lt;0.001</b> | Intervention effect | -7.67 (-12.54;-2.97) | <b>0.002</b>     | -7.89 (-12.49;-3.28) | <b>0.001</b>     |
|                  | 12 m | 35.4 (0.7) | 32.2 (0.7) | 32.1 (0.7) | +1.25 (2.0) <i>p</i> =0.529           | Follow-up effect    | -2.68 (-7.79;2.42)   | 0.303            | -3.78 (-8.51;.95)    | 0.117            |
| MM 6 - evening   | 0 m  | 5.1 (0.4)  | 4.5 (0.3)  | 4.7 (0.2)  |                                       |                     |                      |                  |                      |                  |
|                  | 6 m  | 7.2 (0.4)  | 3.8 (0.3)  | 4.3 (0.2)  | <b>+2.10 (0.7) <i>p</i>=0.004</b>     | Intervention effect | -2.79 (-4.63;-.96)   | <b>0.003</b>     | -2.52 (-4.25;-.79)   | <b>0.004</b>     |
|                  | 12 m | 7.3 (0.4)  | 4.3 (0.3)  | 4.7 (0.2)  | <b>+2.25 (0.7) <i>p</i>=0.003</b>     | Follow-up effect    | -2.40 (-4.31;-.48)   | <b>0.014</b>     | -2.20 (-3.97;-.42)   | <b>0.015</b>     |

\* P values for the comparison among the groups from baseline to 6 months and 12 months were calculated with the use of mixed-model analysis of repeated measures. Fixed factors include time and group\*time interaction. Random intercepts include cluster and subject. Unless otherwise noted, no covariates added. <sup>a</sup> Covariates Sex and Age were added. <sup>b</sup> Model without cluster. CON, Control group (*n*=84); HBex, Home-based exercise training group (*n*=63); HBex-Pro, Home-based exercise training with dietary protein counselling group (*n*=65).

# HBex-Pro is the reference group. † Difference in mean scores HBex-Pro vs HBex. ‡ Difference in mean scores HBex-Pro vs CON.

**Supplementary Table S2. Frequencies of leucine compliers per meal ( $\geq 2.5$  g) for all groups**

Article title: Digitally supported dietary protein counselling changes dietary protein intake, sources and distribution in community-dwelling older adults

Journal name: Nutrients

Author names: Jantine van den Helder, Sjors Verlaan, Michael Tieland, Jorinde Scholten, Sumit Mehra, Bart Visser, Ben J.A. Kröse, Raoul H.H. Engelbert and Peter J.M. Weijs.

Corresponding Author: Jantine van den Helder, Faculty of Sports and Nutrition, Center of Expertise Urban Vitality, Amsterdam University of Applied Sciences, Dokter Meurerlaan 8, 1067 SM, Amsterdam, the Netherlands

T +31621155919 | Email [j.e.m.van.den.helder@hva.nl](mailto:j.e.m.van.den.helder@hva.nl)

**Table S2.** Frequencies of leucine compliers per meal ( $\geq 2.5$  g) for all groups.

|         | HBex-Pro      |               |                | HBex          |               |                | CON           |               |                |
|---------|---------------|---------------|----------------|---------------|---------------|----------------|---------------|---------------|----------------|
|         | 0 m<br>(n=65) | 6 m<br>(n=45) | 12 m<br>(n=42) | 0 m<br>(n=63) | 6 m<br>(n=55) | 12 m<br>(n=48) | 0 m<br>(n=84) | 6 m<br>(n=81) | 12 m<br>(n=77) |
| 0 meals | 25 (39)       | 4 (9)         | 14 (33)        | 36 (57)       | 21 (38)       | 21 (44)        | 33 (39)       | 33 (41)       | 33 (43)        |
| 1 meal  | 34 (52)       | 25 (56)       | 20 (48)        | 23 (37)       | 29 (53)       | 23 (48)        | 43 (51)       | 41 (51)       | 39 (51)        |
| 2 meals | 6 (9)         | 13 (29)       | 7 (17)         | 4 (6)         | 5 (9)         | 3 (6)          | 8 (10)        | 7 (9)         | 5 (6)          |
| 3 meals |               | 3 (7)         | 1 (2)          |               |               | 1 (2)          |               |               |                |

No. and (%) of compliers to the leucine per meal target ( $\geq 2.5$  gram). CON, Control group; HBex, Home-based exercise training group; HBex-Pro, Home-based exercise training with dietary protein counselling group.

**Supplementary Table S3. Frequencies of protein compliers per meal ( $\geq 25$  g) for all groups**

Article title: Digitally supported dietary protein counselling changes dietary protein intake, sources and distribution in community-dwelling older adults

Journal name: Nutrients

Author names: Jantine van den Helder, Sjors Verlaan, Michael Tieland, Jorinde Scholten, Sumit Mehra, Bart Visser, Ben J.A. Kröse, Raoul H.H. Engelbert and Peter J.M. Weijs.

Corresponding Author: Jantine van den Helder, Faculty of Sports and Nutrition, Center of Expertise Urban Vitality, Amsterdam University of Applied Sciences, Dokter Meurerlaan 8, 1067 SM, Amsterdam, the Netherlands

T +31621155919 | Email [j.e.m.van.den.helder@hva.nl](mailto:j.e.m.van.den.helder@hva.nl)



**Table S3.** Frequencies of compliers of protein per meal ( $\geq 25$  g) for all groups.

|                | HBex-Pro      |               |                | HBex          |               |                | CON           |               |                |
|----------------|---------------|---------------|----------------|---------------|---------------|----------------|---------------|---------------|----------------|
|                | 0 m<br>(n=65) | 6 m<br>(n=45) | 12 m<br>(n=42) | 0 m<br>(n=63) | 6 m<br>(n=55) | 12 m<br>(n=48) | 0 m<br>(n=84) | 6 m<br>(n=81) | 12 m<br>(n=77) |
| 0 meals        | 10 (15)       | 5 (11)        | 10 (24)        | 14 (22)       | 10 (18)       | 10 (21)        | 16 (19)       | 10 (12)       | 18 (23)        |
| 1 meal         | 39 (60)       | 16 (36)       | 19 (45)        | 37 (59)       | 35 (64)       | 26 (54)        | 46 (55)       | 54 (67)       | 38 (49)        |
| 2 meals        | 14 (22)       | 15 (33)       | 7 (17)         | 11 (17)       | 9 (16)        | 12 (25)        | 21 (25)       | 16 (20)       | 21 (27)        |
| $\geq 3$ meals | 2 (3)         | 9 (20)        | 6 (14)         | 1 (2)         | 1 (2)         | 0 (0)          | 1 (1)         | 1 (1)         | 0 (0)          |

No. and (%) of compliers to the protein per meal target ( $\geq 25$  gram). CON, Control group; HBex, Home-based exercise training group; HBex-Pro, Home-based exercise training with dietary protein counselling group.
